# Supplementary material
Source: publisher figshare collection journal article supplement (https://karger.figshare.com/ndownloader/files/27670953)
Supplement: Supplementary file 1 [file 27670953]

**
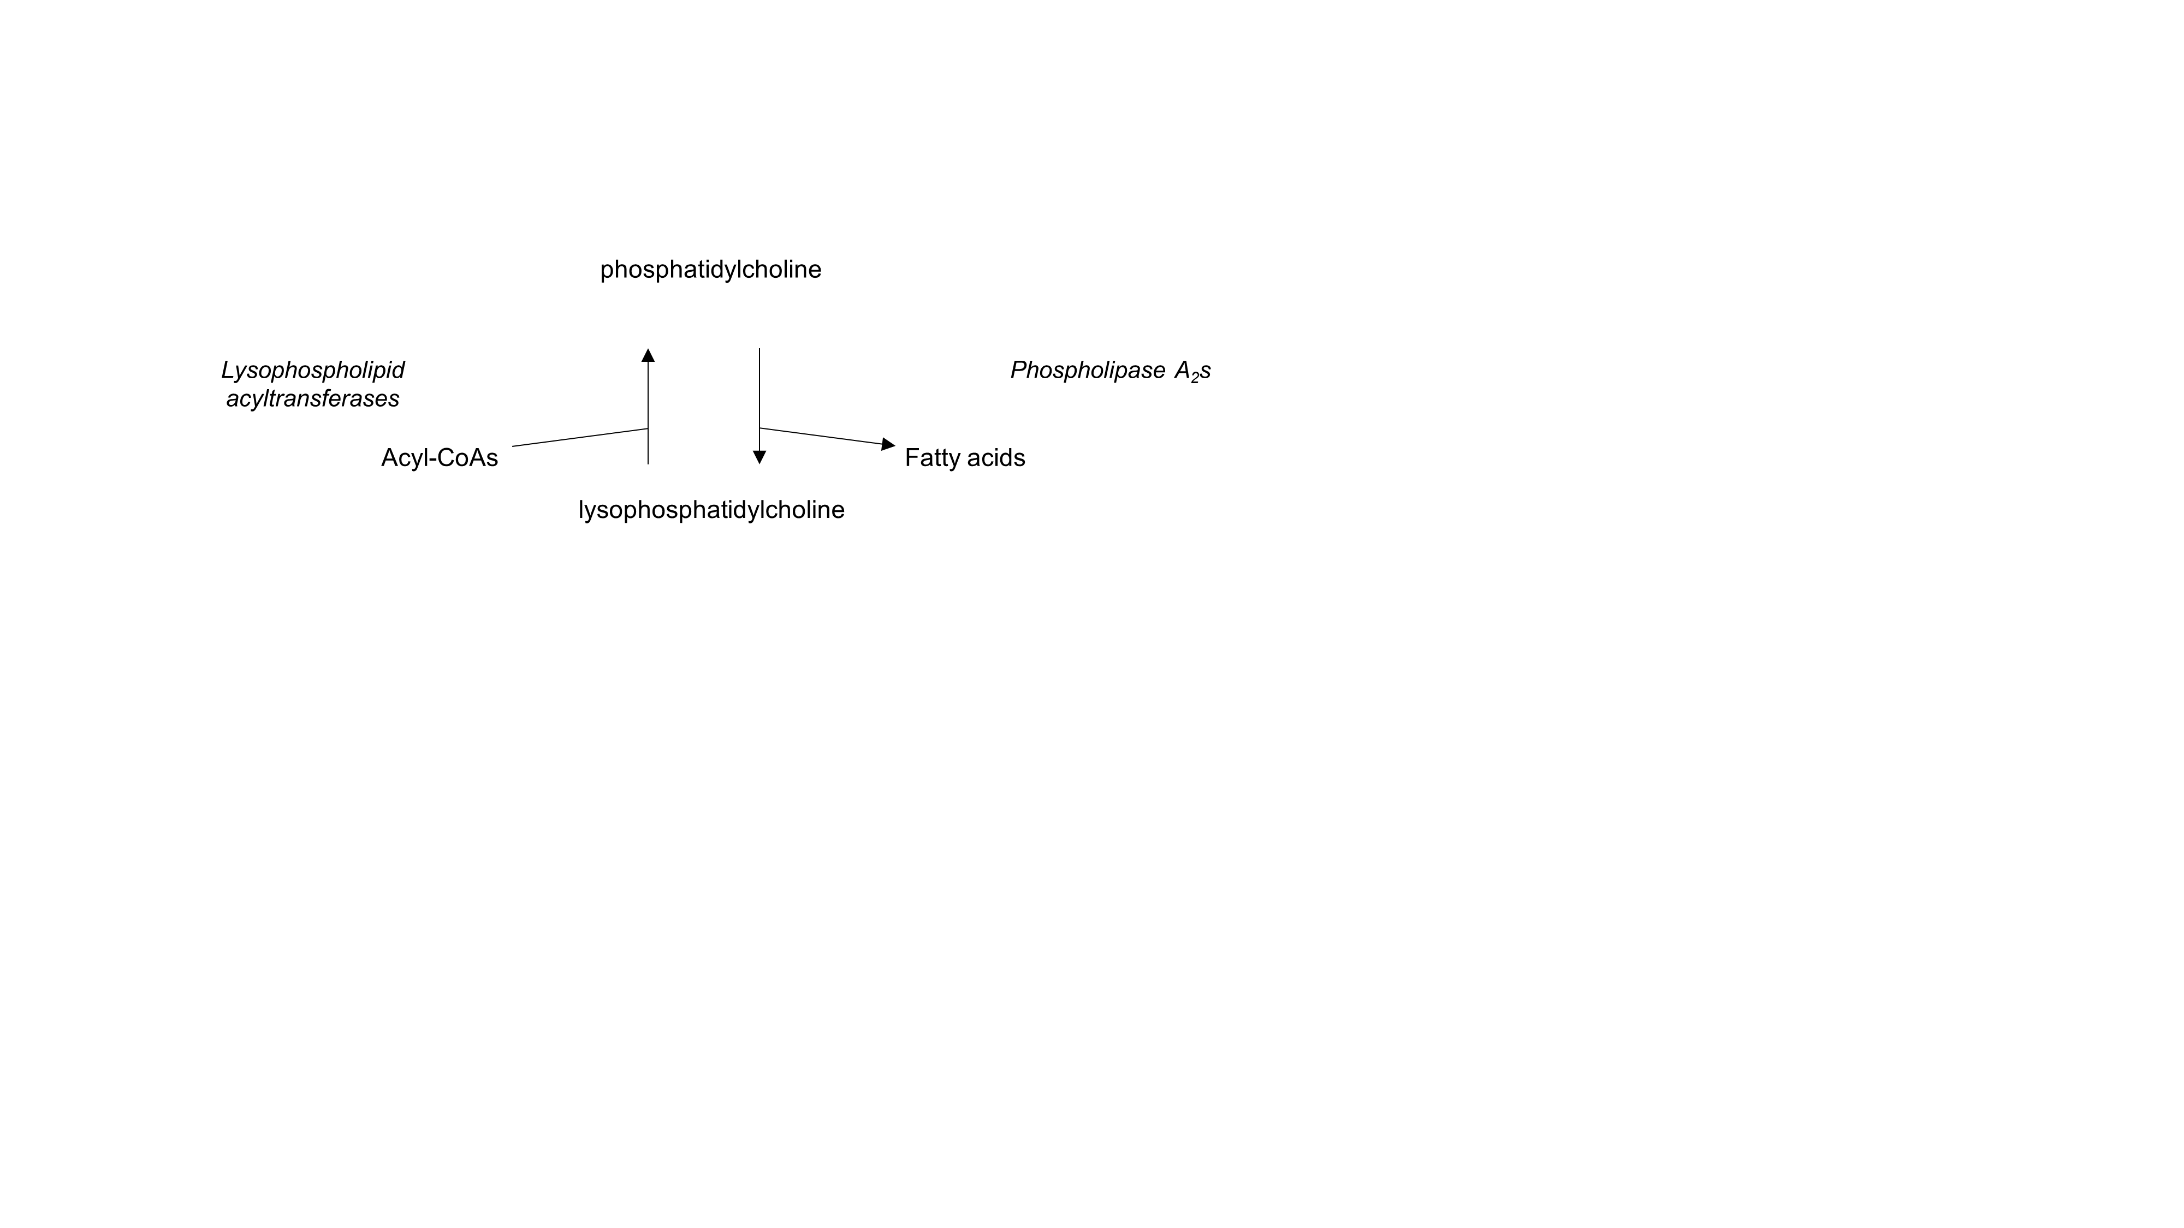
**

**Fig. S3**: The Lands’ cycle. Pathways are shown in a schematic way including molecules and enzymes involved. The fatty acid composition in phosphatidylcholines is modified in the so-called Lands’ cycle. While lysophospholipid acyltransferases (LPCAT) catalyze acylation of lysophosphatidylcholine resulting in phosphatidylcholine, phospholipases (PLA) catalyze the deacylation of phosphatidylcholine to produce lysophosphatidylcholine.

References:

1. Hishikawa D, Hashidate T, Shimizu T, Shindou H. Diversity and function of membrane glycerophospholipids generated by the remodeling pathway in mammalian cells. J Lipid Res2014;55:799-807.
